# Supplementary material
Source: PubMed Central journal article supplement (PMC2893806)
Supplement: ddq174_1.pdf [file ddq174_1.pdf]

**Supplemental Materials for “Common variants associated with breast cancer in genome wide association studies are modifiers of breast cancer risk in BRCA1 and BRCA2 mutation carriers”**

**Supplemental Table 1.** Associations between GWAS SNPs and risk of breast cancer ( $P_{\text{trend}} \leq 0.05$ ) in BRCA1 mutation carriers.

| rsID       | Gene Name      | HR (95% CI)<br>(Per Allele) | $P_{\text{trend}}$   | HR (95% CI)      |                  | $P_{2df}$ |
|------------|----------------|-----------------------------|----------------------|------------------|------------------|-----------|
|            |                |                             |                      | 1 copy           | 2 copies         |           |
| rs6138178  | <i>SNRPB</i>   | 0.78 (0.69-0.90)            | $3.6 \times 10^{-4}$ | 0.75 (0.63-0.90) | 0.66 (0.49-0.90) | 0.0015    |
| rs6602595  | <i>CAMK1D</i>  | 1.25 (1.10-1.41)            | $4.2 \times 10^{-4}$ | 1.23 (1.02-1.48) | 1.56 (1.21-2.01) | 0.0019    |
| rs6590224  | <i>KIRREL3</i> | 1.26 (1.10-1.45)            | 0.0013               | 1.25 (1.05-1.50) | 1.61 (1.10-2.37) | 0.0056    |
| rs1048635  | <i>TRIM45</i>  | 1.50 (1.17-1.94)            | 0.0015               | 1.59 (1.22-2.09) | 1.15 (0.24-5.44) | 0.0029    |
| rs7629693  | <i>HMG2P7</i>  | 0.83 (0.73-0.94)            | 0.0041               | 0.88 (0.74-1.05) | 0.65 (0.49-0.86) | 0.0104    |
| rs6005863  | <i>HSCB</i>    | 0.85 (0.76-0.95)            | 0.0049               | 1.01 (0.84-1.22) | 0.66 (0.52-0.85) | 0.0007    |
| rs4415084  | <i>MRPS30</i>  | 0.84 (0.75-0.95)            | 0.0052               | 0.80 (0.67-0.96) | 0.73 (0.57-0.93) | 0.015     |
| rs2292326  | <i>NECAB2</i>  | 1.27 (1.06-1.52)            | 0.0087               | 1.31 (1.07-1.61) | 1.33 (0.68-2.57) | 0.026     |
| rs2107425  | <i>H19</i>     | 0.85 (0.75-0.97)            | 0.015                | 0.84 (0.70-1.00) | 0.74 (0.55-0.99) | 0.049     |
| rs3174298  | <i>CDC37L1</i> | 1.16 (1.03-1.32)            | 0.018                | 1.14 (0.95-1.37) | 1.37 (1.05-1.79) | 0.055     |
| rs9518578  | <i>FGF14</i>   | 0.79 (0.65-0.96)            | 0.019                | 0.72 (0.58-0.89) | 1.21 (0.61-2.43) | 0.009     |
| rs448203   | <i>SEPT9</i>   | 1.15 (1.02-1.29)            | 0.024                | 1.23 (1.02-1.47) | 1.27 (0.99-1.63) | 0.051     |
| rs10941679 | <i>MRPS30</i>  | 0.85 (0.75-0.98)            | 0.024                | 0.80 (0.67-0.95) | 0.83 (0.60-1.15) | 0.039     |
| rs4294134  | <i>NUP205</i>  | 1.19 (1.02-1.39)            | 0.031                | 1.21 (1.00-1.47) | 1.32 (0.84-2.08) | 0.092     |
| rs1451036  | <i>COL11A1</i> | 1.18 (1.01-1.39)            | 0.039                | 1.16 (0.96-1.39) | 1.53 (0.94-2.48) | 0.19      |
| rs7121523  | <i>PPFIBP2</i> | 0.84 (0.72-0.99)            | 0.040                | 0.82 (0.68-1.00) | 0.78 (0.48-1.26) | 0.10      |
| rs1024454  | <i>SKAP2</i>   | 1.13 (1.00-1.28)            | 0.045                | 1.08 (0.89-1.33) | 1.28 (1.01-1.64) | 0.12      |

**Supplemental Table 2:** Significant associations with breast cancer risk in BRCA1 mutation carriers after excluding ovarian cancer cases.

| SNP ID           | Gene Name            | HR (95% CI)             | $P_{\text{trend}}$ | HR <sub>het</sub> (95% CI) | HR <sub>hom</sub> (95% CI) | $P_{2df}$    |
|------------------|----------------------|-------------------------|--------------------|----------------------------|----------------------------|--------------|
| rs6590224        | <i>KIRREL3</i>       | 1.45 (1.23-1.71)        | 0.00001            | 1.53 (1.25-1.88)           | 1.86 (1.19-2.91)           | 0.00004      |
| rs7629693        | <i>HMG2P7</i>        | 0.80 (0.69-0.93)        | 0.0029             | 0.91 (0.73-1.13)           | 0.56 (0.41-0.77)           | 0.0019       |
| <b>rs6602595</b> | <b><i>CAMK1D</i></b> | <b>1.23 (1.07-1.41)</b> | <b>0.0039</b>      | <b>1.17 (0.94-1.45)</b>    | <b>1.53 (1.15-2.03)</b>    | <b>0.013</b> |
| rs1048635        | <i>TRIM45</i>        | 1.56 (1.15-2.11)        | 0.0039             | 1.79 (1.31-2.46)           | 0.72 (0.14-3.70)           | 0.0013       |
| rs2738545        | <i>WWOX</i>          | 0.80 (0.69-0.94)        | 0.0051             | 0.75 (0.61-0.92)           | 0.71 (0.49-1.02)           | 0.011        |
| rs1024454        | <i>SKAP2</i>         | 1.22 (1.06-1.41)        | 0.0067             | 1.20 (0.94-1.52)           | 1.49 (1.12-1.99)           | 0.025        |
| rs1451036        | <i>COL11A1</i>       | 1.28 (1.07-1.54)        | 0.0082             | 1.20 (0.96-1.49)           | 2.08 (1.24-3.48)           | 0.010        |
| rs2562343        | <i>MYO10</i>         | 1.20 (1.05-1.37)        | 0.0092             | 1.44 (1.13-1.83)           | 1.40 (1.06-1.84)           | 0.0090       |
| rs2292326        | <i>NECAB2</i>        | 1.31 (1.06-1.62)        | 0.012              | 1.36 (1.06-1.74)           | 1.40 (0.69-2.83)           | 0.042        |
| rs6005863        | <i>HSCB</i>          | 0.84 (0.73-0.96)        | 0.013              | 1.07 (0.86-1.33)           | 0.63 (0.47-0.85)           | 0.00066      |
| rs17570439       | <i>TRIT1</i>         | 1.23 (1.04-1.46)        | 0.019              | 1.22 (1.00-1.50)           | 1.54 (0.93-2.54)           | 0.060        |
| rs12907709       | <i>MCTP2</i>         | 1.18 (1.02-1.36)        | 0.022              | 1.23 (0.99-1.53)           | 1.36 (1.01-1.83)           | 0.072        |
| rs649944         | <i>PIWILA</i>        | 0.86 (0.75-0.98)        | 0.024              | 0.91 (0.71-1.16)           | 0.73 (0.56-0.96)           | 0.063        |
| rs13387042       | <i>TNPI</i>          | 1.18 (1.02-1.37)        | 0.026              | 1.21 (0.96-1.53)           | 1.40 (1.04-1.87)           | 0.077        |
| rs3174298        | <i>CDC37L1</i>       | 1.18 (1.02-1.36)        | 0.026              | 1.15 (0.92-1.43)           | 1.42 (1.04-1.94)           | 0.073        |
| rs13079811       | <i>CYP51P1</i>       | 1.19 (1.02-1.38)        | 0.027              | 1.16 (0.93-1.45)           | 1.44 (1.03-2.03)           | 0.082        |
| rs9518578        | <i>FGF14</i>         | 0.77 (0.60-0.97)        | 0.030              | 0.69 (0.53-0.89)           | 1.51 (0.67-3.41)           | 0.010        |
| rs10231161       | <i>SKAP2</i>         | 1.17 (1.01-1.35)        | 0.031              | 1.16 (0.93-1.45)           | 1.37 (1.02-1.84)           | 0.096        |
| <b>rs6138178</b> | <b><i>SNRPB</i></b>  | <b>0.84 (0.72-0.98)</b> | <b>0.031</b>       | <b>0.82 (0.66-1.02)</b>    | <b>0.73 (0.50-1.06)</b>    | <b>0.097</b> |
| rs8064773        | <i>ACCN1</i>         | 1.31 (1.02-1.67)        | 0.031              | 1.31 (1.00-1.72)           | 1.68 (0.59-4.77)           | 0.099        |
| rs9923960        | <i>TOX3</i>          | 0.84 (0.71-0.99)        | 0.033              | 0.81 (0.66-1.00)           | 0.73 (0.50-1.07)           | 0.091        |
| rs694975         | <i>LOC442271</i>     | 0.82 (0.68-0.99)        | 0.034              | 0.89 (0.71-1.11)           | 0.54 (0.32-0.91)           | 0.058        |
| rs6890833        | <i>MCC</i>           | 1.31 (1.02-1.69)        | 0.034              | 1.45 (1.10-1.92)           | 0.83 (0.28-2.53)           | 0.028        |
| rs3738097        | <i>ALPL</i>          | 1.25 (1.01-1.53)        | 0.036              | 1.25 (0.99-1.58)           | 1.50 (0.68-3.27)           | 0.11         |
| rs6735174        | <i>TNPI</i>          | 0.82 (0.69-0.99)        | 0.036              | 0.83 (0.66-1.03)           | 0.66 (0.38-1.16)           | 0.11         |
| rs3134615        | <i>MYCL1</i>         | 1.20 (1.01-1.42)        | 0.036              | 1.14 (0.93-1.39)           | 1.60 (1.01-2.53)           | 0.093        |
| rs6053812        | <i>MCM8</i>          | 1.19 (1.01-1.52)        | 0.037              | 1.24 (1.01-1.53)           | 1.25 (0.81-1.92)           | 0.10         |
| rs12101585       | <i>LOC100130789</i>  | 0.86 (0.74-0.99)        | 0.038              | 0.77 (0.64-0.94)           | 0.81 (0.60-1.11)           | 0.034        |
| rs3738099        | <i>ALPL</i>          | 1.24 (1.01-1.52)        | 0.038              | 1.25 (0.99-1.58)           | 1.50 (0.68-3.27)           | 0.12         |
| rs1461282        | <i>MKRN5</i>         | 1.17 (1.00-1.36)        | 0.04444            | 1.07 (0.87-1.31)           | 1.45 (1.05-2.02)           | 0.083        |
| rs1378506        | <i>LOC100130252</i>  | 0.87 (0.75-1.00)        | 0.04666            | 0.80 (0.64-1.01)           | 0.76 (0.57-1.02)           | 0.095        |
| rs956993         | <i>HNT</i>           | 1.17 (1.00-1.36)        | 0.04889            | 1.12 (0.91-1.38)           | 1.40 (1.00-1.94)           | 0.13         |

**Supplemental Table 3:** Significant associations with breast cancer risk in BRCA1 mutation carriers after excluding prevalent cases (> 5 years between cancer diagnosis and ascertainment).

| SNP ID           | Gene Name            | HR (95% CI)             | $P_{\text{trend}}$ | HR <sub>het</sub> (95% CI) | HR <sub>hom</sub> (95% CI) | $P_{2df}$    |
|------------------|----------------------|-------------------------|--------------------|----------------------------|----------------------------|--------------|
| rs9473086        | <i>PHACTR1</i>       | 1.31 (1.09-1.58)        | 0.0047             | 1.22 (0.98-1.51)           | 2.33 (1.28-4.22)           | 0.0071       |
| <b>rs6138178</b> | <b><i>SNRPB</i></b>  | <b>0.81 (0.70-0.94)</b> | <b>0.0061</b>      | <b>0.80 (0.65-0.98)</b>    | <b>0.68 (0.47-0.98)</b>    | <b>0.022</b> |
| rs10092157       | <i>MRPL9P1</i>       | 1.19 (1.04-1.35)        | 0.010              | 1.11 (0.89-1.38)           | 1.42 (1.09-1.84)           | 0.029        |
| rs12101585       | <i>LOC100130789</i>  | 0.82 (0.71-0.96)        | 0.011              | 0.77 (0.64-0.94)           | 0.73 (0.53-1.01)           | 0.023        |
| rs2562343        | <i>MYO10</i>         | 1.19 (1.04-1.37)        | 0.011              | 1.31 (1.05-1.64)           | 1.41 (1.06-1.87)           | 0.027        |
| rs1607237        | <i>PIK3CA</i>        | 1.19 (1.04-1.36)        | 0.014              | 1.22 (0.99-1.51)           | 1.39 (1.05-1.84)           | 0.047        |
| rs17732513       | <i>FBLN5</i>         | 1.20 (1.04-1.40)        | 0.014              | 1.07 (0.87-1.31)           | 1.64 (1.19-2.26)           | 0.010        |
| <b>rs6602595</b> | <b><i>CAMK1D</i></b> | <b>1.18 (1.03-1.35)</b> | <b>0.017</b>       | <b>1.20 (0.96-1.50)</b>    | <b>1.38 (1.05-1.82)</b>    | <b>0.057</b> |
| rs13260143       | <i>MRPL9P1</i>       | 0.85 (0.75-0.97)        | 0.019              | 0.82 (0.65-1.03)           | 0.73 (0.56-0.95)           | 0.059        |
| rs3174298        | <i>CDC37L1</i>       | 1.17 (1.02-1.33)        | 0.021              | 1.28 (1.04-1.57)           | 1.27 (0.95-1.70)           | 0.042        |
| rs7629693        | <i>HMGN2P7</i>       | 0.85 (0.73-0.98)        | 0.022              | 0.87 (0.71-1.07)           | 0.70 (0.51-0.96)           | 0.073        |
| rs4766950        | <i>CIT</i>           | 1.17 (1.02-1.35)        | 0.024              | 1.14 (0.91-1.44)           | 1.37 (1.04-1.81)           | 0.075        |
| rs9518578        | <i>FGF14</i>         | 0.77 (0.62-0.97)        | 0.025              | 0.70 (0.54-0.89)           | 1.14 (0.52-2.49)           | 0.016        |
| rs4415084        | <i>MRPS30</i>        | 0.86 (0.75-0.98)        | 0.027              | 0.83 (0.68-1.02)           | 0.75 (0.57-0.99)           | 0.079        |
| rs16902126       | <i>POU5F1P1</i>      | 1.15 (1.01-1.32)        | 0.035              | 1.29 (1.03-1.61)           | 1.30 (0.98-1.71)           | 0.059        |
| rs918979         | <i>ELMO1</i>         | 1.15 (1.01-1.35)        | 0.038              | 1.06 (0.85-1.33)           | 1.35 (1.04-1.76)           | 0.062        |
| rs6590224        | <i>KIRREL3</i>       | 1.19 (1.01-1.40)        | 0.038              | 1.15 (0.94-1.41)           | 1.51 (0.98-2.32)           | 0.099        |
| rs7342847        | <i>PRKCA</i>         | 0.87 (0.76-0.99)        | 0.042              | 0.89 (0.72-1.09)           | 0.74 (0.55-0.99)           | 0.12         |
| rs17184313       | <i>RIN3</i>          | 0.84 (0.71-1.00)        | 0.045              | 0.81 (0.65-1.00)           | 0.79 (0.48-1.29)           | 0.11         |
| rs7121523        | <i>PPFIBP2</i>       | 0.84 (0.70-1.00)        | 0.045              | 0.87 (0.70-1.08)           | 0.60 (0.34-1.04)           | 0.11         |
| rs1024454        | <i>SKAP2</i>         | 1.16 (1.00-1.33)        | 0.045              | 1.08 (0.86-1.37)           | 1.33 (1.01-1.76)           | 0.10         |

**Supplemental Table 4:** Significant associations with breast cancer risk in BRCA1 mutation carriers after accounting for oophorectomy as time-dependent covariate.

| <b>SNP ID</b> | <b>Gene Name</b> | <b>HR (95% CI)</b>      | <b><math>P_{\text{trend}}</math></b> | <b>HR<sub>het</sub> (95% CI)</b> | <b>HR<sub>hom</sub> (95% CI)</b> | <b><math>P_{2df}</math></b> |
|---------------|------------------|-------------------------|--------------------------------------|----------------------------------|----------------------------------|-----------------------------|
| rs6138178     | <i>SNRPB</i>     | <b>0.77 (0.67-0.88)</b> | <b>0.00011</b>                       | <b>0.74 (0.62-0.89)</b>          | <b>0.63 (0.46-0.87)</b>          | <b>0.00049</b>              |
| rs6602595     | <i>CAMK1D</i>    | <b>1.24 (1.10-1.40)</b> | <b>0.00062</b>                       | <b>1.26 (1.04-1.52)</b>          | <b>1.53 (1.19-1.97)</b>          | <b>0.0028</b>               |
| rs6590224     | <i>KIRREL3</i>   | 1.28 (1.11-1.48)        | 0.0007                               | 1.27 (1.06-1.52)                 | 1.68 (1.14-2.48)                 | 0.0031                      |
| rs1048635     | <i>TRIM45</i>    | 1.49 (1.16-1.49)        | 0.0019                               | 1.57 (1.20-2.05)                 | 1.27 (0.27-6.11)                 | 0.0046                      |
| rs4415084     | <i>MRPS30</i>    | 0.83 (0.74-0.94)        | 0.0033                               | 0.78 (0.65-0.94)                 | 0.71 (0.56-0.92)                 | 0.0085                      |
| rs6005863     | <i>HSCB</i>      | 0.84 (0.75-0.95)        | 0.0034                               | 0.99 (0.83-1.19)                 | 0.66 (0.62-0.84)                 | 0.00077                     |
| rs7629693     | <i>HMGN2P7</i>   | 0.83 (0.73-0.94)        | 0.0045                               | 0.88 (0.74-1.06)                 | 0.65 (0.49-0.86)                 | 0.011                       |
| rs2107425     | <i>H19</i>       | 0.84 (0.74-0.95)        | 0.0074                               | 0.83 (0.69-0.99)                 | 0.71 (0.53-0.96)                 | 0.027                       |
| rs2292326     | <i>NECAB2</i>    | 1.25 (1.05-1.50)        | 0.014                                | 1.29 (1.05-1.58)                 | 1.33 (0.68-2.58)                 | 0.044                       |
| rs9518578     | <i>FGF14</i>     | 0.79 (0.65-0.96)        | 0.017                                | 0.72 (0.58-0.90)                 | 1.14 (0.55-2.34)                 | 0.012                       |
| rs448203      | <i>SEPT9</i>     | 1.15 (1.02-1.29)        | 0.023                                | 1.23 (1.02-1.48)                 | 1.28 (1.00-1.64)                 | 0.052                       |
| rs4294134     | <i>NUP205</i>    | 1.20 (1.02-1.40)        | 0.024                                | 1.22 (1.01-1.48)                 | 1.35 (0.85-2.13)                 | 0.075                       |
| rs4072373     | <i>HMGCLL1</i>   | 0.86 (0.75-0.98)        | 0.029                                | 0.87 (0.73-1.04)                 | 0.72 (0.50-1.02)                 | 0.088                       |
| rs10941679    | <i>MRPS30</i>    | 0.86 (0.75-0.99)        | 0.030                                | 0.80 (0.67-0.96)                 | 0.84 (0.60-1.16)                 | 0.047                       |
| rs3174298     | <i>CDC37L1</i>   | 1.14 (1.01-1.29)        | 0.039                                | 1.13 (0.94-1.36)                 | 1.31 (1.00-1.72)                 | 0.12                        |
| rs1451036     | <i>COL11A1</i>   | 1.19 (1.01-1.40)        | 0.040                                | 1.17 (0.97-1.41)                 | 1.47 (0.89-2.43)                 | 0.12                        |
| rs7121523     | <i>PPFIBP2</i>   | 0.85 (0.72-1.00)        | 0.048                                | 0.83 (0.68-1.00)                 | 0.78 (0.48-1.27)                 | 0.12                        |

**Supplemental Table 5.** Associations between GWAS SNPs and risk of breast cancer ( $P_{\text{trend}} \leq 0.05$ ) in BRCA2 mutation carriers.

| rsID       | Gene Name           | HR (95% CI)<br>(Per Allele) | $P_{\text{trend}}$                     | HR (95% CI)             |                         | $P_{2df}$      |
|------------|---------------------|-----------------------------|----------------------------------------|-------------------------|-------------------------|----------------|
|            |                     |                             |                                        | 1 copy                  | 2 copies                |                |
| rs9393597  | <i>LOC134997</i>    | <b>1.55 (1.25-1.92)</b>     | <b><math>6.0 \times 10^{-5}</math></b> | <b>1.56 (1.18-2.08)</b> | <b>2.33 (1.23-4.39)</b> | <b>0.00030</b> |
| rs12652447 | <i>FBXL7</i>        | <b>1.37 (1.16-1.62)</b>     | <b><math>1.7 \times 10^{-4}</math></b> | <b>1.25 (0.96-1.62)</b> | <b>1.92 (1.39-2.67)</b> | <b>0.00041</b> |
| rs6837016  | <i>LOC729902</i>    | 0.76 (0.63-0.90)            | 0.0020                                 | 0.68 (0.53-0.88)        | 0.60 (0.42-0.85)        | 0.0046         |
| rs909116   | <i>TNNT3</i>        | 0.79 (0.68-0.92)            | 0.0025                                 | 0.88 (0.68-1.14)        | 0.61 (0.45-0.84)        | 0.0078         |
| rs2067980  | <i>MRPS30</i>       | 1.42 (1.12-1.80)            | 0.0036                                 | 1.31 (1.02-1.69)        | 3.86 (1.40-10.6)        | 0.0053         |
| rs4660891  | <i>MAST2</i>        | 1.32 (1.09-1.60)            | 0.0040                                 | 1.50 (1.18-1.92)        | 1.44 (0.88-2.35)        | 0.0040         |
| rs10941679 | <i>MRPS30</i>       | 1.31 (1.08-1.58)            | 0.0054                                 | 1.33 (1.06-1.68)        | 1.65 (1.00-2.72)        | 0.019          |
| rs1533802  | <i>LOC339778</i>    | 0.79 (0.67-0.94)            | 0.0072                                 | 0.89 (0.70-1.13)        | 0.50 (0.32-0.78)        | 0.0090         |
| rs17827708 | <i>DSEL</i>         | 0.74 (0.59-0.93)            | 0.0093                                 | 0.70 (0.54-0.90)        | 0.77 (0.37-1.62)        | 0.018          |
| rs7185203  | <i>CMIP</i>         | 0.79 (0.67-0.95)            | 0.010                                  | 0.84 (0.66-1.07)        | 0.59 (0.40-0.88)        | 0.032          |
| rs6504950  | <i>STXBP4</i>       | 1.27 (1.06-1.53)            | 0.010                                  | 1.31 (1.04-1.65)        | 1.53 (0.94-2.49)        | 0.034          |
| rs7090828  | <i>PCBD1</i>        | 0.81 (0.69-0.95)            | 0.010                                  | 0.93 (0.72-1.21)        | 0.62 (0.45-0.87)        | 0.012          |
| rs7871803  | <i>TUSC1</i>        | 0.83 (0.71-0.96)            | 0.015                                  | 0.78 (0.60-1.01)        | 0.69 (0.51-0.94)        | 0.044          |
| rs10808749 | <i>RRS1</i>         | 0.83 (0.72-0.97)            | 0.018                                  | 0.91 (0.70-1.18)        | 0.68 (0.50-0.92)        | 0.040          |
| rs1329499  | <i>LOC100129859</i> | 1.23 (1.03-1.46)            | 0.020                                  | 1.16 (0.92-1.47)        | 1.61 (1.08-2.41)        | 0.055          |
| rs6914091  | <i>FYN</i>          | 0.82 (0.69-0.97)            | 0.020                                  | 0.79 (0.61-1.02)        | 0.68 (0.49-0.96)        | 0.064          |
| rs9518578  | <i>FGF14</i>        | 1.36 (1.05-1.76)            | 0.021                                  | 1.44 (1.08-1.91)        | 1.40 (0.48-4.12)        | 0.041          |
| rs1607237  | <i>PIK3CA</i>       | 1.23 (1.02-1.47)            | 0.026                                  | 1.03 (0.80-1.32)        | 1.62 (1.12-2.34)        | 0.021          |
| rs785467   | <i>PIK3R3</i>       | 0.82 (0.69-0.98)            | 0.026                                  | 0.76 (0.60-0.96)        | 0.76 (0.52-1.11)        | 0.057          |
| rs17383211 | <i>LOC100129774</i> | 0.83 (0.70-0.98)            | 0.027                                  | 0.84 (0.67-1.06)        | 0.67 (0.47-0.98)        | 0.087          |
| rs2473253  | <i>WNT4</i>         | 0.78 (0.63-0.98)            | 0.029                                  | 0.84 (0.65-1.09)        | 0.44 (0.21-0.93)        | 0.057          |
| rs7190785  | <i>GRIN2A</i>       | 1.21 (1.02-1.44)            | 0.031                                  | 1.14 (0.90-1.44)        | 1.56 (1.05-2.32)        | 0.080          |
| rs15958    | <i>RASSF3</i>       | 1.19 (1.02-1.40)            | 0.031                                  | 1.18 (0.91-1.54)        | 1.42 (1.03-1.95)        | 0.097          |
| rs2352593  | <i>TEC</i>          | 1.21 (1.02-1.47)            | 0.032                                  | 1.17 (0.93-1.47)        | 1.51 (1.01-2.24)        | 0.096          |
| rs4546928  | <i>LOC100129950</i> | 0.78 (0.63-0.98)            | 0.032                                  | 0.76 (0.59-0.99)        | 0.68 (0.34-1.35)        | 0.088          |
| rs9564996  | <i>LOC730242</i>    | 1.26 (1.02-1.56)            | 0.035                                  | 1.29 (0.99-1.67)        | 1.46 (0.74-2.89)        | 0.11           |
| rs16886165 | <i>MAP3K1</i>       | 1.24 (1.01-1.53)            | 0.040                                  | 1.31 (1.02-1.68)        | 1.32 (0.69-2.51)        | 0.093          |
| rs6735174  | <i>TNP1</i>         | 0.79 (0.62-0.99)            | 0.040                                  | 0.81 (0.62-1.06)        | 0.52 (0.23-1.19)        | 0.12           |
| rs1374468  | <i>TACC3</i>        | 1.24 (1.01-1.53)            | 0.040                                  | 1.21 (0.94-1.55)        | 1.65 (0.94-2.92)        | 0.12           |
| rs1433211  | <i>LOC644624</i>    | 1.19 (1.01-1.40)            | 0.043                                  | 1.22 (0.96-1.56)        | 1.39 (0.97-1.99)        | 0.12           |
| rs2107425  | <i>H19</i>          | 1.19 (1.00-1.42)            | 0.044                                  | 1.29 (1.02-1.64)        | 1.30 (0.85-1.99)        | 0.079          |
| rs8014727  | <i>TRA@</i>         | 0.84 (0.71-1.00)            | 0.046                                  | 1.07 (0.83-2.37)        | 0.52 (0.35-0.78)        | 0.0015         |
| rs448203   | <i>SEPT9</i>        | 0.83 (0.69-1.00)            | 0.046                                  | 0.76 (0.59-0.98)        | 0.74 (0.51-1.08)        | 0.080          |
| rs17755917 | <i>BTG3</i>         | 1.29 (1.00-1.67)            | 0.047                                  | 1.33 (1.00-1.78)        | 1.37 (0.50-3.77)        | 0.13           |
| rs6837118  | <i>LDB2</i>         | 1.34 (1.00-1.79)            | 0.049                                  | 1.27 (0.94-1.73)        | 2.62 (0.73-9.36)        | 0.12           |

**Supplemental Table 6:** Significant associations with breast cancer risk in BRCA2 mutation carriers after excluding ovarian cancer cases.

| SNP ID     | Gene Name           | HR (95% CI)             | $P_{\text{trend}}$ | HR <sub>het</sub> (95% CI) | HR <sub>hom</sub> (95% CI) | $P_{2df}$      |
|------------|---------------------|-------------------------|--------------------|----------------------------|----------------------------|----------------|
| rs12652447 | <i>FBXL7</i>        | <b>1.38 (1.15-1.66)</b> | <b>0.00056</b>     | <b>1.23 (0.91-1.65)</b>    | <b>1.97 (1.38-2.83)</b>    | <b>0.00079</b> |
| rs4777792  | <i>UNQ9370</i>      | 1.35 (1.12-1.63)        | 0.0015             | 1.68 (1.30-2.17)           | 1.34 (0.84-2.13)           | 0.00032        |
| rs4660891  | <i>MAST2</i>        | 1.34 (1.09-1.65)        | 0.0049             | 1.39 (1.06-1.82)           | 1.69 (1.04-2.74)           | 0.019          |
| rs909116   | <i>TNNT3</i>        | 0.80 (0.68-0.94)        | 0.0070             | 0.96 (0.73-1.27)           | 0.62 (0.44-0.87)           | 0.013          |
| rs7185203  | <i>CMIP</i>         | 0.77 (0.63-0.93)        | 0.0075             | 0.82 (0.63-1.07)           | 0.55 (0.35-0.86)           | 0.027          |
| rs9393597  | <i>LOC134997</i>    | <b>1.40 (1.09-1.79)</b> | <b>0.0078</b>      | <b>1.35 (0.99-1.85)</b>    | <b>2.16 (0.97-4.82)</b>    | <b>0.028</b>   |
| rs6837016  | <i>LOC729902</i>    | 0.77 (0.64-0.94)        | 0.0087             | 0.75 (0.56-1.00)           | 0.61 (0.41-0.89)           | 0.030          |
| rs7090828  | <i>PCBD1</i>        | 0.79 (0.66-0.94)        | 0.0088             | 0.89 (0.67-1.19)           | 0.59 (0.41-0.86)           | 0.014          |
| rs17033285 | <i>SRBD1</i>        | 1.53 (1.11-2.10)        | 0.0089             | 1.35 (0.97-1.88)           | 17.9 (4.66-68.6)           | 0.00006        |
| rs4546928  | <i>LOC100129950</i> | 0.73 (0.57-0.92)        | 0.0095             | 0.76 (0.57-1.01)           | 0.46 (0.20-1.07)           | 0.036          |
| rs1533802  | <i>LOC339778</i>    | 0.78 (0.64-0.95)        | 0.012              | 0.98 (0.75-1.29)           | 0.40 (0.24-0.68)           | 0.0024         |
| rs1433211  | <i>LOC644624</i>    | 1.26 (1.05-1.52)        | 0.014              | 1.26 (0.97-1.64)           | 1.60 (1.06-2.40)           | 0.047          |
| rs848124   | <i>SLC25A21</i>     | 1.26 (1.05-1.51)        | 0.014              | 1.05 (0.78-1.40)           | 1.64 (1.15-2.36)           | 0.012          |
| rs2067980  | <i>MRPS30</i>       | 1.38 (1.06-1.80)        | 0.016              | 1.29 (0.97-1.72)           | 3.12 (1.03-9.44)           | 0.036          |
| rs6914091  | <i>FYN</i>          | 0.80 (0.66-0.96)        | 0.017              | 0.80 (0.61-1.07)           | 0.63 (0.43-0.93)           | 0.057          |
| rs1460475  | <i>KCNIP4</i>       | 0.78 (0.63-0.96)        | 0.020              | 0.81 (0.61-1.07)           | 0.55 (0.31-0.98)           | 0.065          |
| rs1418884  | <i>FRMD4A</i>       | 0.80 (0.66-0.97)        | 0.024              | 0.78 (0.58-1.04)           | 0.65 (0.43-0.97)           | 0.074          |
| rs4817896  | <i>KCNJ6</i>        | 0.80 (0.66-0.97)        | 0.024              | 0.78 (0.60-1.02)           | 0.65 (0.41-1.04)           | 0.075          |
| rs10450393 | <i>SORBS1</i>       | 1.23 (1.02-1.47)        | 0.026              | 1.50 (1.13-1.99)           | 1.35 (0.92-1.99)           | 0.018          |
| rs10808749 | <i>RRS1</i>         | 0.83 (0.69-0.98)        | 0.030              | 0.84 (0.63-1.12)           | 0.68 (0.48-0.96)           | 0.089          |
| rs2107425  | <i>H19</i>          | 1.24 (1.02-1.50)        | 0.031              | 1.34 (1.02-1.74)           | 1.39 (0.86-2.25)           | 0.066          |
| rs2061771  | <i>ZNF765</i>       | 0.74 (0.56-0.98)        | 0.034              | 0.60 (0.44-0.82)           | 1.56 (0.69-3.52)           | 0.0015         |
| rs2074985  | <i>FOXMI</i>        | 1.23 (1.02-1.49)        | 0.034              | 1.22 (0.93-1.66)           | 1.53 (1.01-2.33)           | 0.10           |
| rs37936    | <i>GNAT3</i>        | 1.21 (1.01-1.46)        | 0.039              | 1.21 (0.90-1.61)           | 1.48 (1.02-2.14)           | 0.11           |
| rs7871803  | <i>TUSC1</i>        | 0.84 (0.71-0.99)        | 0.044              | 0.78 (0.59-1.04)           | 0.71 (0.50-1.01)           | 0.10           |
| rs12608723 | <i>FLJ12355</i>     | 1.28 (1.01-1.63)        | 0.044              | 1.25 (0.93-1.68)           | 1.80 (0.83-3.90)           | 0.12           |
| rs6504950  | <i>STXBP4</i>       | 1.23 (1.00-1.50)        | 0.046              | 1.26 (0.98-1.64)           | 1.41 (0.83-2.40)           | 0.13           |
| rs3109633  | <i>SHISA3</i>       | 1.32 (1.00-1.73)        | 0.047              | 1.34 (0.99-1.82)           | 1.58 (0.57-4.40)           | 0.13           |
| rs4766886  | <i>KSR2</i>         | 0.82 (0.68-1.00)        | 0.047              | 0.86 (0.66-1.12)           | 0.65 (0.42-1.01)           | 0.14           |
| rs9564996  | <i>LOC730242</i>    | 1.26 (1.00-1.59)        | 0.050              | 1.37 (1.03-1.83)           | 1.20 (0.60-2.41)           | 0.097          |

**Supplemental Table 7:** Significant associations with breast cancer risk in BRCA2 mutation carriers after excluding prevalent cases (> 5 years between cancer diagnosis and ascertainment).

| SNP ID            | Gene Name        | HR (95% CI)             | $P_{\text{trend}}$ | HR <sub>het</sub> (95% CI) | HR <sub>hom</sub> (95% CI) | $P_{2df}$      |
|-------------------|------------------|-------------------------|--------------------|----------------------------|----------------------------|----------------|
| <b>rs9393597</b>  | <b>LOC134997</b> | <b>1.58 (1.24-2.00)</b> | <b>0.00016</b>     | <b>1.51 (1.10-2.09)</b>    | <b>2.77 (1.47-5.20)</b>    | <b>0.00045</b> |
| rs6837016         | LOC729902        | 0.70 (0.58-0.85)        | 0.00040            | 0.63 (0.47-0.83)           | 0.52 (0.35-0.77)           | 0.00069        |
| rs17033285        | SRBD1            | 1.64 (1.18-2.28)        | 0.0030             | 1.55 (1.12-2.16)           | 5.19 (1.14-23.7)           | 0.0062         |
| rs10941679        | MRPS30           | 1.39 (1.11-1.74)        | 0.0042             | 1.39 (1.06-1.81)           | 1.94 (1.04-3.62)           | 0.015          |
| <b>rs12652447</b> | <b>FBXL7</b>     | <b>1.31 (1.09-1.59)</b> | <b>0.0047</b>      | <b>1.23 (0.91-1.68)</b>    | <b>1.76 (2.21-2.55)</b>    | <b>0.012</b>   |
| rs7871803         | TUSC1            | 0.78 (0.66-0.93)        | 0.0064             | 0.89 (0.65-1.20)           | 0.60 (0.41-0.86)           | 0.018          |
| rs6914091         | FYN              | 0.77 (0.63-0.93)        | 0.0077             | 0.73 (0.54-0.98)           | 0.61 (0.41-0.91)           | 0.024          |
| rs17827708        | DSEL             | 0.69 (0.52-0.92)        | 0.0099             | 0.67 (0.49-0.92)           | 0.60 (0.23-1.55)           | 0.033          |
| rs1533802         | LOC339778        | 0.78 (0.65-0.94)        | 0.011              | 0.86 (0.65-1.13)           | 0.52 (0.32-0.85)           | 0.026          |
| rs10808749        | RRS1             | 0.80 (0.68-0.95)        | 0.012              | 0.97 (0.71-1.32)           | 0.61 (0.43-0.89)           | 0.019          |
| rs6567201         | LOC100129867     | 1.36 (1.06-1.74)        | 0.014              | 1.31 (0.97-1.76)           | 2.11 (0.99-4.46)           | 0.041          |
| rs15958           | RASSF3           | 1.26 (1.04-1.52)        | 0.016              | 1.16 (0.85-1.59)           | 1.59 (1.10-2.29)           | 0.041          |
| rs2067980         | MRPS30           | 1.38 (1.06-1.79)        | 0.016              | 1.30 (0.98-1.72)           | 3.05 (1.09-8.52)           | 0.027          |
| rs918979          | ELMO1            | 1.25 (1.04-1.50)        | 0.019              | 1.37 (1.01-1.87)           | 1.54 (1.05-2.26)           | 0.050          |
| rs12210212        | GFRAL            | 0.77 (0.62-0.96)        | 0.019              | 0.78 (0.59-1.02)           | 0.59 (0.35-0.99)           | 0.064          |
| rs12907709        | MCTP2            | 0.80 (0.66-0.97)        | 0.020              | 0.80 (0.60-1.07)           | 0.63 (0.42-0.95)           | 0.065          |
| rs785467          | PIK3R3           | 0.78 (0.63-0.96)        | 0.020              | 0.66 (0.50-0.88)           | 0.75 (0.48-1.18)           | 0.019          |
| rs2107425         | H19              | 1.27 (1.03-1.55)        | 0.022              | 1.33 (1.01-1.76)           | 1.50 (0.91-2.48)           | 0.061          |
| rs37936           | GNAT3            | 1.23 (1.03-1.48)        | 0.022              | 1.51 (1.12-2.03)           | 1.40 (0.94-2.08)           | 0.020          |
| rs8014727         | TRA@             | 0.79 (0.64-0.97)        | 0.024              | 1.03 (0.77-1.38)           | 0.43 (0.25-0.72)           | 0.0022         |
| rs2352593         | TEC              | 1.25 (1.03-1.51)        | 0.027              | 1.26 (0.96-1.64)           | 1.54 (1.00-2.38)           | 0.086          |
| rs4660891         | MAST2            | 1.27 (1.02-1.58)        | 0.031              | 1.62 (1.20-2.18)           | 1.07 (0.59-1.94)           | 0.0062         |
| rs4546928         | LOC100129950     | 0.75 (0.57-0.98)        | 0.032              | 0.68 (0.50-0.93)           | 0.83 (0.40-1.73)           | 0.050          |
| rs6504950         | STXBP4           | 1.25 (1.01-1.54)        | 0.037              | 1.21 (0.92-1.57)           | 1.67 (0.96-2.91)           | 0.10           |
| rs9564996         | LOC730242        | 1.28 (1.01-1.61)        | 0.041              | 1.39 (1.05-1.84)           | 1.15 (0.53-2.52)           | 0.068          |
| rs1457020         | LOC730105        | 0.80 (0.64-0.99)        | 0.042              | 0.76 (0.58-1.01)           | 0.70 (0.39-1.23)           | 0.11           |
| rs12425296        | KSR2             | 1.26 (1.01-1.57)        | 0.042              | 1.30 (0.98-1.73)           | 1.50 (0.87-2.60)           | 0.11           |
| rs1370182         | LOC391774        | 0.78 (0.61-0.99)        | 0.045              | 0.72 (0.54-0.96)           | 0.78 (0.38-1.61)           | 0.074          |
| rs10892162        | DSCAML1          | 0.76 (0.58-0.99)        | 0.045              | 0.76 (0.55-1.04)           | 0.57 (0.25-1.28)           | 0.13           |



**Supplemental Table 8:** Significant associations with breast cancer risk in BRCA2 mutation carriers after accounting for oophorectomy as a time-dependent covariate.

| <b>SNP ID</b> | <b>Gene Name</b>    | <b>HR (95% CI)</b>      | <b><math>P_{\text{trend}}</math></b> | <b>HR<sub>het</sub> (95% CI)</b> | <b>HR<sub>hom</sub> (95% CI)</b> | <b><math>P_{2df}</math></b> |
|---------------|---------------------|-------------------------|--------------------------------------|----------------------------------|----------------------------------|-----------------------------|
| rs9393597     | <i>LOC134997</i>    | <b>1.53 (1.23-1.90)</b> | <b>0.00011</b>                       | <b>1.54 (1.15-2.06)</b>          | <b>2.29 (1.23-4.29)</b>          | <b>0.00056</b>              |
| rs12652447    | <i>FBXL7</i>        | <b>1.38 (1.17-1.63)</b> | <b>0.00017</b>                       | <b>1.23 (0.95-1.60)</b>          | <b>1.95 (1.40-2.71)</b>          | <b>0.00035</b>              |
| rs6837016     | <i>LOC729902</i>    | 0.76 (0.63-0.90)        | 0.0022                               | 0.68 (0.52-0.88)                 | 0.60 (0.42-0.86)                 | 0.0042                      |
| rs909116      | <i>TNNT3</i>        | 0.79 (0.68-0.92)        | 0.0028                               | 0.88 (0.68-1.15)                 | 0.62 (0.45-0.85)                 | 0.0084                      |
| rs2067980     | <i>MRPS30</i>       | 1.43 (1.13-1.82)        | 0.0031                               | 1.33 (1.03-1.72)                 | 3.82 (1.39-10.5)                 | 0.0048                      |
| rs10941679    | <i>MRPS30</i>       | 1.32 (1.09-1.61)        | 0.0047                               | 1.34 (1.06-1.71)                 | 1.70 (1.02-2.82)                 | 0.017                       |
| rs17827708    | <i>DSEL</i>         | 0.73 (0.58-0.91)        | 0.0059                               | 0.68 (0.53-0.88)                 | 0.76 (0.36-1.59)                 | 0.012                       |
| rs4660891     | <i>MAST2</i>        | 1.30 (1.08-1.58)        | 0.0068                               | 1.48 (1.16-1.90)                 | 1.39 (0.85-2.28)                 | 0.0063                      |
| rs1533802     | <i>LOC339778</i>    | 0.79 (0.67-0.94)        | 0.0077                               | 0.89 (0.70-1.14)                 | 0.49 (0.31-0.78)                 | 0.0094                      |
| rs1329499     | <i>LOC100129859</i> | 1.26 (1.06-1.50)        | 0.0099                               | 1.14 (0.90-1.45)                 | 1.78 (1.20-2.66)                 | 0.017                       |
| rs6504950     | <i>STXBP4</i>       | 1.27 (1.06-1.53)        | 0.0099                               | 1.32 (1.05-1.67)                 | 1.51 (0.92-2.46)                 | 0.031                       |
| rs7185203     | <i>CMIP</i>         | 0.80 (0.67-0.95)        | 0.010                                | 0.85 (0.67-1.08)                 | 0.59 (0.39-0.88)                 | 0.031                       |
| rs7090828     | <i>PCBD1</i>        | 0.81 (0.69-0.95)        | 0.011                                | 0.95 (0.73-1.24)                 | 0.62 (0.44-0.87)                 | 0.0098                      |
| rs6914091     | <i>FYN</i>          | 0.81 (0.69-0.96)        | 0.014                                | 0.78 (0.60-1.01)                 | 0.67 (0.48-0.94)                 | 0.044                       |
| rs7871803     | <i>TUSC1</i>        | 0.83 (0.72-0.97)        | 0.018                                | 0.78 (0.60-1.02)                 | 0.70 (0.52-0.95)                 | 0.054                       |
| rs7190785     | <i>GRIN2A</i>       | 1.23 (1.03-1.47)        | 0.019                                | 1.15 (0.90-1.46)                 | 1.62 (1.09-2.41)                 | 0.050                       |
| rs15958       | <i>RASSF3</i>       | 1.21 (1.03-1.42)        | 0.019                                | 1.22 (0.93-1.60)                 | 1.46 (1.06-2.01)                 | 0.065                       |
| rs2473253     | <i>WNT4</i>         | 0.77 (0.62-0.96)        | 0.023                                | 0.83 (0.64-1.08)                 | 0.42 (0.19-0.92)                 | 0.049                       |
| rs9518578     | <i>FGF14</i>        | 1.36 (1.04-1.78)        | 0.025                                | 1.43 (1.07-1.92)                 | 1.41 (0.44-4.53)                 | 0.047                       |
| rs785467      | <i>PIK3R3</i>       | 0.82 (0.69-0.98)        | 0.025                                | 0.76 (0.60-0.97)                 | 0.74 (0.51-1.09)                 | 0.061                       |
| rs2352593     | <i>TEC</i>          | 1.22 (1.02-1.45)        | 0.026                                | 1.18 (0.94-1.49)                 | 1.52 (1.03-2.26)                 | 0.080                       |
| rs12922061    | <i>LOC643714</i>    | 1.24 (1.02-1.51)        | 0.028                                | 1.17 (0.92-1.49)                 | 1.71 (1.03-2.84)                 | 0.077                       |
| rs8014727     | <i>TRA@</i>         | 0.82 (0.69-0.98)        | 0.028                                | 1.06 (0.83-1.37)                 | 0.49 (0.33-0.74)                 | 0.00063                     |
| rs17383211    | <i>LOC100129774</i> | 0.83 (0.70-0.98)        | 0.028                                | 0.84 (0.66-1.06)                 | 0.68 (0.47-0.99)                 | 0.091                       |
| rs10808749    | <i>RRS1</i>         | 0.85 (0.73-0.99)        | 0.032                                | 0.91 (0.69-1.19)                 | 0.70 (0.52-0.96)                 | 0.076                       |
| rs9564996     | <i>LOC730242</i>    | 1.27 (1.02-1.58)        | 0.034                                | 1.28 (0.99-1.66)                 | 1.53 (0.75-3.11)                 | 0.10                        |
| rs4546928     | <i>LOC100129950</i> | 0.78 (0.62-0.98)        | 0.034                                | 0.76 (0.58-0.99)                 | 0.69 (0.34-1.37)                 | 0.090                       |
| rs1607237     | <i>PIK3CA</i>       | 1.21 (1.01-1.44)        | 0.040                                | 1.01 (0.79-1.30)                 | 1.58 (1.10-2.28)                 | 0.027                       |
| rs4817896     | <i>KCNJ6</i>        | 0.83 (0.69-0.99)        | 0.041                                | 0.80 (0.63-1.03)                 | 0.72 (0.48-1.07)                 | 0.12                        |
| rs6735174     | <i>TNP1</i>         | 0.79 (0.62-1.00)        | 0.047                                | 0.81 (0.62-1.06)                 | 0.54 (0.23-1.26)                 | 0.14                        |
| rs1374468     | <i>TACC3</i>        | 1.23 (1.00-1.52)        | 0.049                                | 1.20 (0.93-1.54)                 | 1.63 (0.92-2.89)                 | 0.14                        |
